# Supplementary material
Source: PubMed Central journal article supplement (PMC5473230)
Supplement: 10.1074_M116.770974_jbc.M116.770974-1.pdf [file 10.1074_M116.770974_jbc.M116.770974-1.pdf]

Supplementary data

IL-1 $\beta$  transcriptionally activates hepcidin by inducing C/EBP $\delta$  expression in hepatocytes

Yohei Kanamori, Masaru Murakami, Makoto Sugiyama, Osamu Hashimoto,  
Tohru Matsui and Masayuki Funaba

Contents: Table S1-S2, Figure S1-S11.

Table S1. Nucleotide sequences used for dsRNAi

| Gene           | Nucleotide sequence                                     | GenBank accession number |
|----------------|---------------------------------------------------------|--------------------------|
| GFP (Control)  | 5'-GUUCAGCGUGUCCGGCGAG <sub>d</sub> T <sub>d</sub> T-3' | AB296083                 |
| C/EBP $\delta$ | 5'-ACAGCCUGGACUUACCACCACUAAA-3'                         | NM_005195                |
| BMP2           | 5'-GAUGCAAGAUGCUUUAGGA <sub>d</sub> T <sub>d</sub> T-3' | NM_001200                |

# Supplementary data

Table S2. Nucleotide sequence of primers used in RT-qPCR and RT-PCR analyses

| Gene              | Forward primer                   | Reverse primer                  | GenBank accession number |
|-------------------|----------------------------------|---------------------------------|--------------------------|
| Human             |                                  |                                 |                          |
| BMP2              | 5'- cggactgcggtctcctaaag -3'     | 5'- ggaagcagcaacgctagaag -3'    | NM_001200                |
| C/EBP $\alpha$    | 5'- gaggaggggagaattcttgg -3'     | 5'- cattccaaggcacaaggtt -3'     | NM_001285829             |
| C/EBP $\beta$     | 5'- ctctctgcttctccctctgc -3'     | 5'- gattgcatcaacttcgaaacc -3'   | NM_001285878             |
| C/EBP $\delta$    | 5'- ggacataggagcgcaaagaa -3'     | 5'- gcttctctcgcagtttagtgg -3'   | NM_005195                |
| C/EBP $\zeta$     | 5'- cagagctggaacctgaggag -3'     | 5'- tgtttatggctgctttggtg -3'    | NM_001195053             |
| Hepcidin          | 5'- ctgttttccacaacagacg -3'      | 5'- ttcgctctggaacatgg -3'       | NM_021175                |
| IL-6              | 5'- agtgaggaacaagccagagc -3'     | 5'- atttgggttggtcagggg -3'      | NM_001318095             |
| TBP               | 5'- cgaaccacggcactgatttt -3'     | 5'- ctgccagtctggactgttct -3'    | NM_003194                |
| Mouse             |                                  |                                 |                          |
| Albumin           | 5'- ggaaaagtgtgcgctgaag -3'      | 5'- cacacacggttcaggattgc -3'    | NM_009654                |
| BMP2              | 5'- cggactgcggtctcctaa -3'       | 5'- ggggaagcagcaacactaga -3'    | NM_007553                |
| C/EBP $\alpha$    | 5'- caagaacagcaacgagtaccg -3'    | 5'- gtcactggtcaactccagcac -3'   | NM_001287514             |
| C/EBP $\beta$     | 5'- acgacttcctctccgacctct -3'    | 5'- cgaggctcacgtaaccgtagt -3'   | NM_001287738             |
| C/EBP $\delta$    | 5'- cgacttcagcgctacattga -3'     | 5'- ctagecagagacccacac -3'      | NM_007679                |
| C/EBP $\zeta$     | 5'- gccagaataacagccggaac -3'     | 5'- gaccaggttctgctttcacgt -3'   | NM_001290183             |
| Hepcidin          | 5'- aagcagggcagacattgcgat -3'    | 5'- caggatgtggctctaggctatgt -3' | NM_032541                |
| IL-1 $\beta$      | 5'- tgtaatgaaagacggcacacc -3'    | 5'- tcttctttgggtattgcttg -3'    | NM_008361                |
| IL-6              | 5'- ctctgcaagagacttccatccagt -3' | 5'- cgtggttggtcaccagcatca -3'   | NM_001314054             |
| Inhibin $\beta$ B | 5'- cgagatcatcagctttgcag -3'     | 5'- ggttgcttcattagagacga -3'    | NM_008381                |
| iNOS              | 5'- ctctgcaagagacttccatccagt -3' | 5'- cgtggttggtcaccagcatca -3'   | NM_010927                |
| Nramp-1           | 5'- ctcatgattagtgacaagagccc -3'  | 5'- ggcaccttggggtagtagaga -3'   | NM_013612                |
| Stabilin-1        | 5'- ttctcatgcctgcctcttg -3'      | 5'- tgggaaattccgagaccagc -3'    | NM_138672                |
| TBP               | 5'- ccaatgactcctatgacccta -3'    | 5'- cagccaagattcacggtatg -3'    | NM_013684                |
| Rat               |                                  |                                 |                          |
| BMP2              | 5'- cggactgcggtctcctaa -3'       | 5'- ggggaagcagcaacactaga -3'    | NM_017178                |
| C/EBP $\delta$    | 5'- gacttcagcgctacattga -3'      | 5'- ctctcgtggcacaactcta -3'     | NM_013154                |
| Hepcidin          | 5'- gatggcactcagcactgga -3'      | 5'- gctgcagctctgtagtctgtct -3'  | NM_053469                |
| iNOS              | 5'- tgcagaaagagctggccgac -3'     | 5'- gatgcgcacatgccacaaac -3'    | NM_012611                |
| TBP               | 5'- ccctatcactcctgccaca -3'      | 5'- ggtcaagtttacagccaagattc -3' | NM_001004198             |

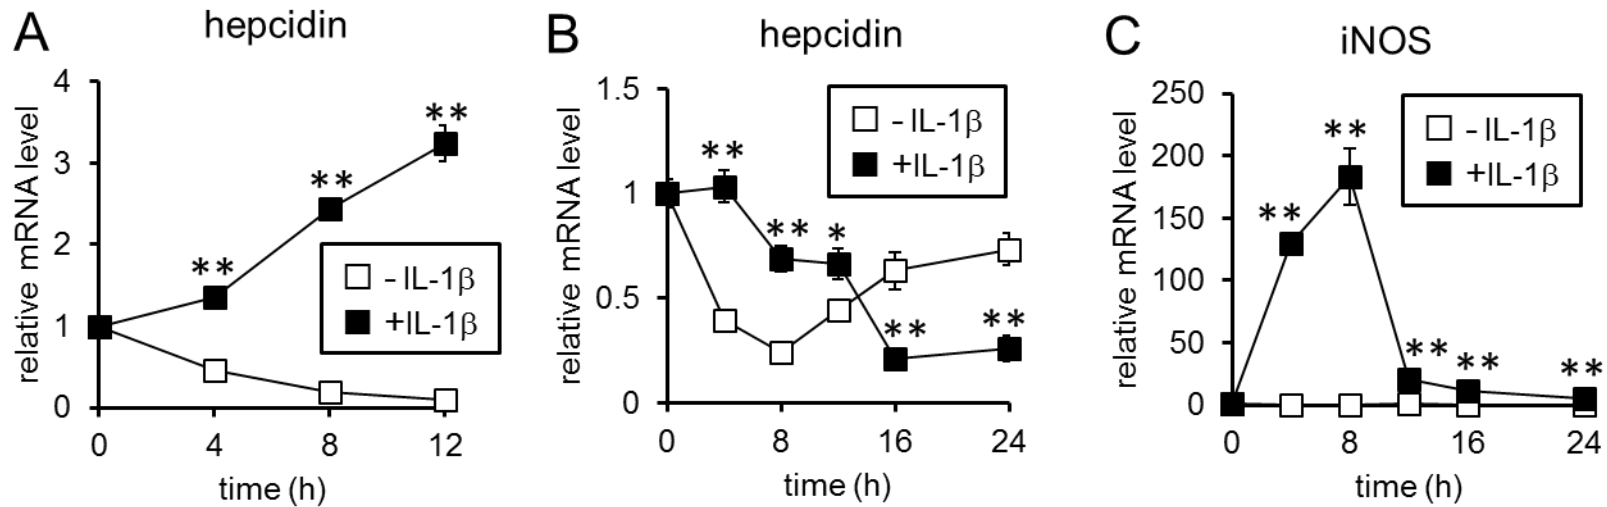

Figure S1. Efficient induction of hepcidin gene expression by IL-1 $\beta$  in primary mouse hepatocytes but not in primary rat hepatocytes. Mouse (A) and rat (B and C) primary hepatocytes were treated with IL-1 $\beta$  (25 ng/mL) for the indicated times. The expression of hepcidin (A and B) and iNOS (C) was examined by RT-qPCR analyses, and the expression level in the cells prior to IL-1 $\beta$  treatment was defined as 1. The data are presented as the mean  $\pm$  SE (n=4). \* $P$  < 0.05 and \*\* $P$  < 0.01 vs. cells without IL-1 $\beta$  treatment at the respective time points.

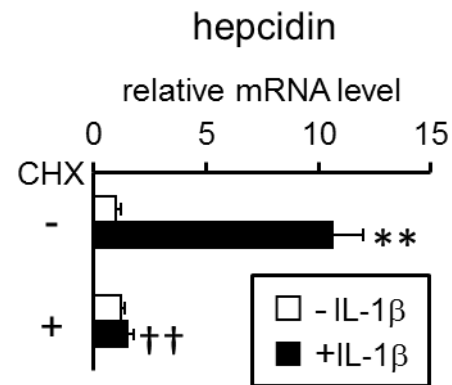

**Figure S2. Blockage of IL-1 $\beta$ -induced hepcidin expression by cycloheximide in primary mouse hepatocytes**

Primary mouse hepatocytes cells were pretreated with or without cycloheximide (CHX, 1  $\mu$ g/mL) followed by treatment with IL-1 $\beta$  (25 ng/mL) for 24 h. The expression level in the control cells treated without CHX and IL-1 $\beta$  was defined as 1. The data are presented as the mean  $\pm$  SE (n=4). \*\* $P$  < 0.01 vs. cells treated with the respective inhibitor (CHX) in the absence of IL-1 $\beta$ . †† $P$  < 0.01 vs. cells with corresponding IL-1 $\beta$  treatments in the absence of cycloheximide.

## Supplementary data

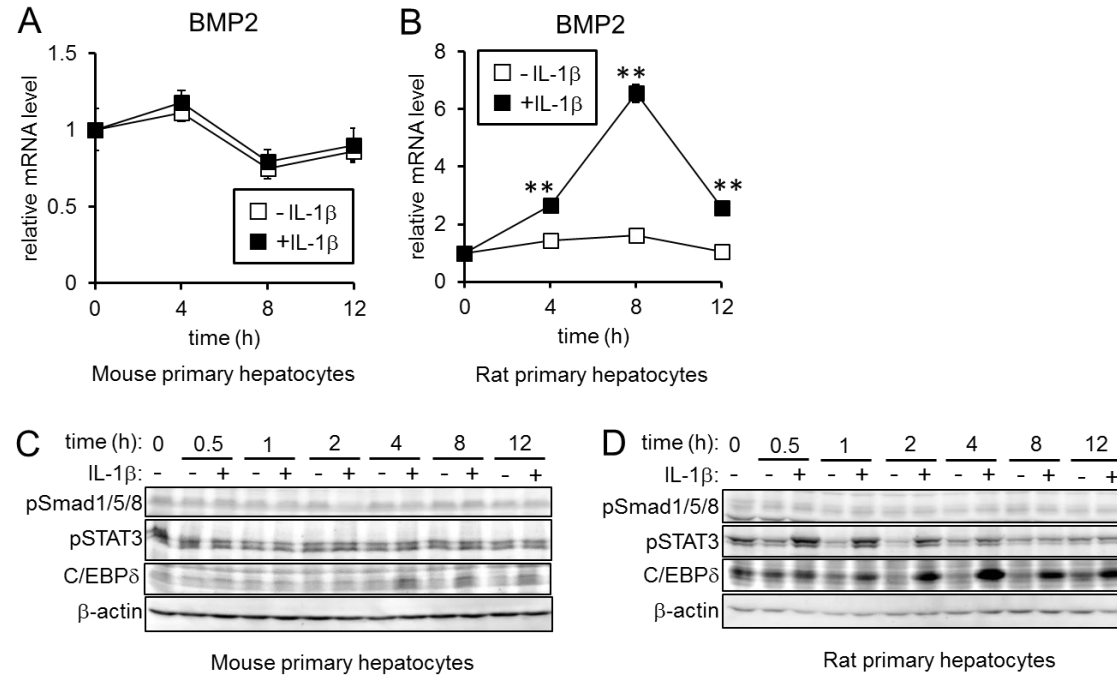

**Figure S3. Failure of BMP pathway activation by IL-1 $\beta$  in primary mouse hepatocytes**

Mouse (A and C) and rat (B and D) primary hepatocytes were treated with or without IL-1 $\beta$  (25 ng/mL) for the indicated times. (A and B) BMP2 expression was examined by RT-qPCR analysis with the level in the control cells prior to IL-1 $\beta$  treatment defined as 1. The data are presented as the mean  $\pm$  SE (n=4). \*\* $P$  < 0.01 vs. cells in the absence of IL-1 $\beta$  at the respective time point. (C and D) Levels of phosphorylated Smad1/5/8 and STAT3 as well as C/EBP $\delta$  expression was examined by Western blot analysis with  $\beta$ -actin as the loading control.

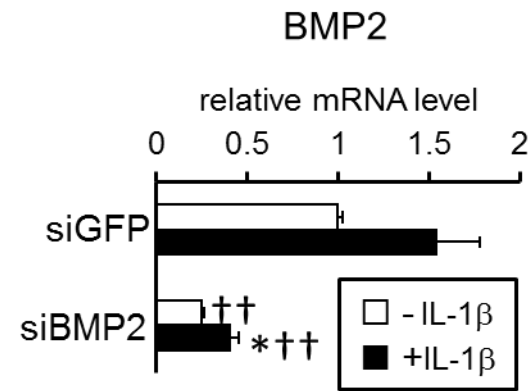

**Figure S4. Down-regulation of BMP2 expression by siRNA knockdown targeting BMP2**

HepG2 cells were transfected with siRNAs targeting the indicated gene. At 48 h after transfection, cells were treated with IL-1 $\beta$  (25 ng/mL) for 4 h. Expression of BMP2 was examined by RT-qPCR analysis with the level in cells transfected with siGFP in the absence of IL-1 $\beta$  defined as 1. The data are presented as the mean  $\pm$  SE (n=3). \* $P$  < 0.05 vs. cells transfected with the respective siRNA in the absence of IL-1 $\beta$ . †† $P$  < 0.01 vs. cells with corresponding IL-1 $\beta$  treatments and transfected with siGFP.

Supplementary data

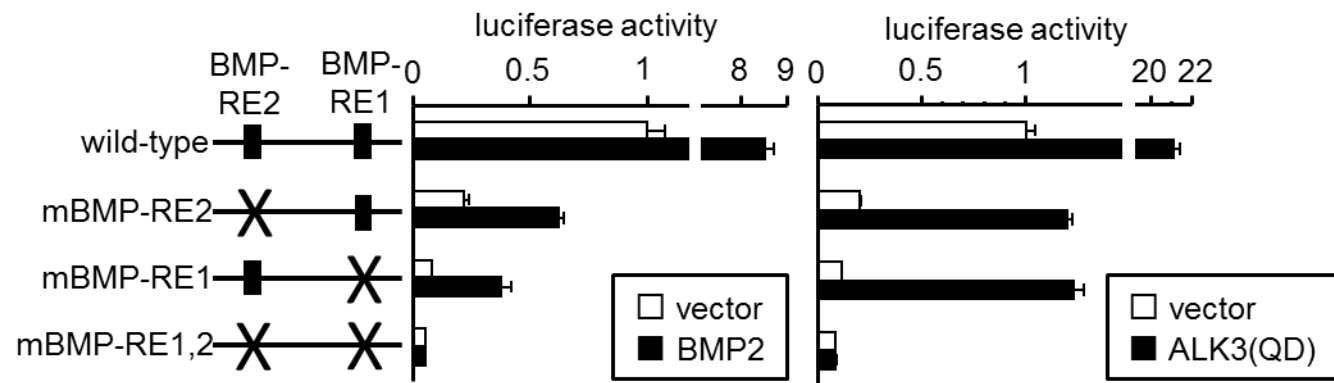

Figure S5. Hepcidin transcription via BMP-REs mediated by the BMP pathway

HepG2 cells were transfected with CMV- $\beta$ Gal and the indicated reporters and expression vectors. At 28 h post-transfection, the cells were harvested. Firefly luciferase activity normalized to  $\beta$ -galactosidase activity was calculated, and the relative luciferase activity in cells transfected with hepcidin(-2018)-luc and empty vector was defined as 1. The data are presented as the mean  $\pm$  SE (n=3).

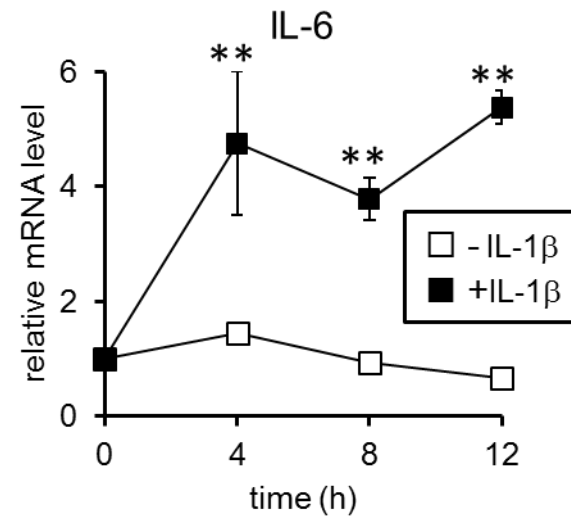

Figure S6. IL-1 $\beta$ -induced IL-6 expression in primary mouse hepatocytes

Primary mouse hepatocytes were treated with IL-1 $\beta$  (25 ng/mL) for the indicated times. Expression of IL-6 was examined by RT-qPCR analysis with the level in the control cells prior to IL-1 $\beta$  treatment defined as 1. The data are presented as the mean  $\pm$  SE (n=4). \*\* $P < 0.01$  vs. cells in the absence of IL-1 $\beta$  at the respective time points.

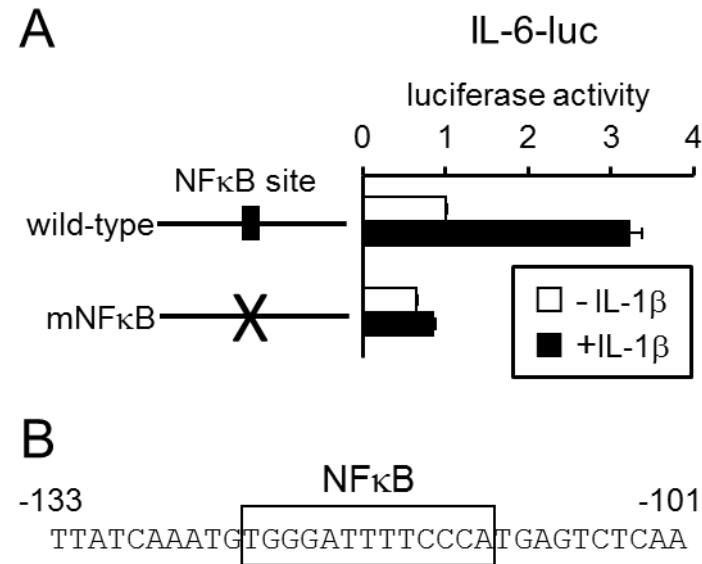

**Figure S7. IL-1 $\beta$ -induced transcription of IL-6 via an NF- $\kappa$ B site**

(A) HepG2 cells were transfected with tk-*Renilla*-luc and the indicated reporters. At 4 h post-transfection, cells were treated with or without IL-1 $\beta$  (10 ng/mL) for 12 h. Firefly luciferase activity normalized to *Renilla* luciferase activity was calculated, and the relative luciferase activity in cells transfected with wild-type IL-6-luc in the absence of IL-1 $\beta$  was defined as 1. The data are presented as the mean  $\pm$  SE (n=3). (B) Nucleotide sequence surrounding the putative NF- $\kappa$ B site (boxed) of the IL-6 gene.

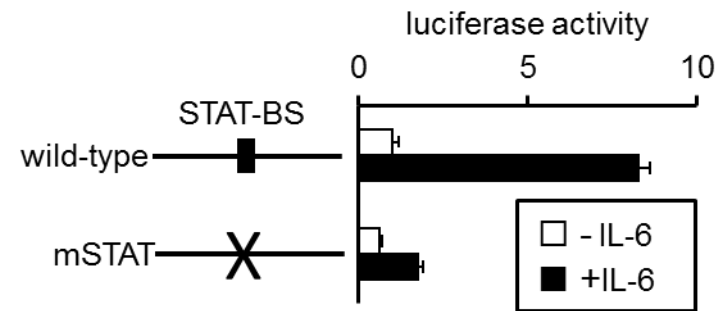

Figure S8. Dependence of the STAT-BS on IL-6-induced hepcidin transcription

HepG2 cells were transfected with thymidine kinase (tk)-Renilla-luc and the indicated reporters. At 4 h post-transfection, cells were treated with or without IL-6 (10 ng/mL) for 24 h. Firefly luciferase activity normalized to *Renilla* luciferase activity was calculated, and the relative luciferase activity in cells transfected with hepcidin(-2018)-luc in the absence of IL-6 was defined as 1. The data are presented as the mean  $\pm$  SE (n=3).

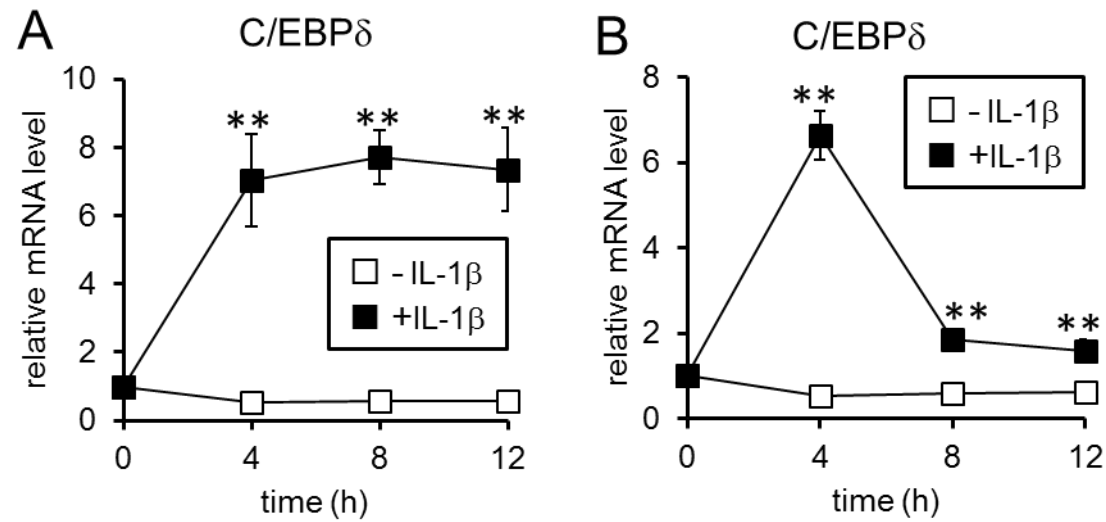

**Figure S9. IL-1 $\beta$ -induced C/EBP $\delta$  expression in primary hepatocytes**

Mouse (A) and rat (B) primary hepatocytes were treated with or without IL-1 $\beta$  (25 ng/mL) for the indicated times. Expression of the C/EBP $\delta$  was examined by RT-qPCR analysis. The expression levels in control cells prior to IL-1 $\beta$  treatment were defined as 1. The data are presented as the mean  $\pm$  SE (n=4). \* $P$  < 0.05 and \*\* $P$  < 0.01 vs. cells in the absence of IL-1 $\beta$  at the respective time points.

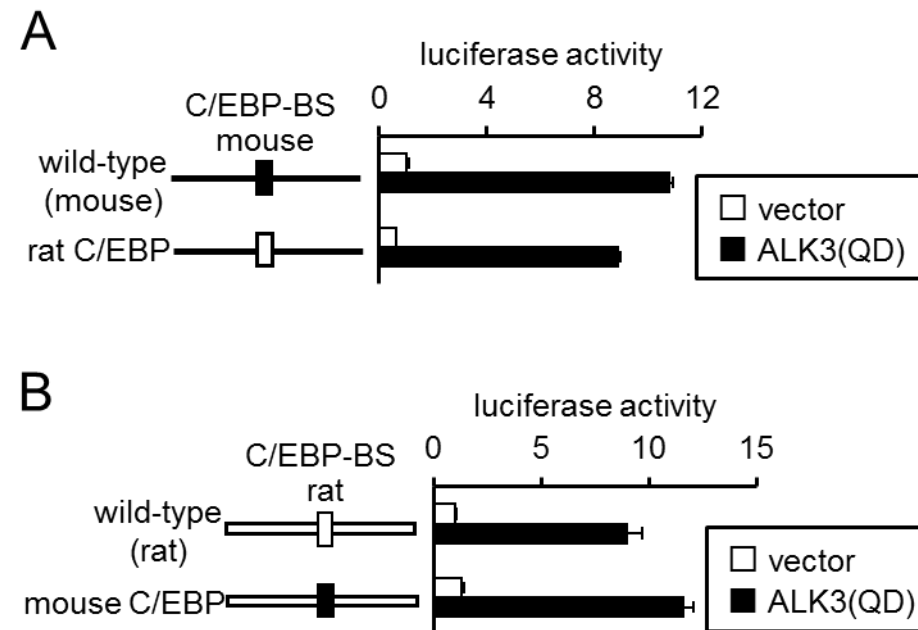

**Figure S10. Swapping the mouse and rat C/EBP-BSs does not affect hepcidin transcription induced by the BMP pathway**

HepG2 cells were transfected with or without ALK3(QD) in addition to tk-Renilla-luc and the indicated reporters. At 28 h post-transfection, cells were harvested. Firefly luciferase activity was normalized to *Renilla* luciferase activity, and the relative luciferase activity in cells transfected with empty vector and either mouse hepcidin(-2018)-luc (A) or rat hepcidin (-1861)-luc (B) was defined as 1. The data are presented as the mean  $\pm$  SE (n=3).

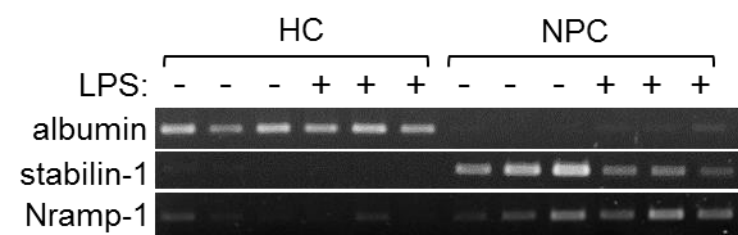

Figure S11. Separation of hepatocytes and non-parenchymal cells from the livers of LPS or PBS-injected mice  
ICR mice were intraperitoneally injected with PBS or LPS (5 mg/kg). At 6 h post-injection, liver cells were separated by a centrifugation-based method. Expression of albumin (hepatocyte marker), stabilin-1 (endothelial cell marker), and Nramp-1 (Kupffer cell marker) was examined by RT-PCR.

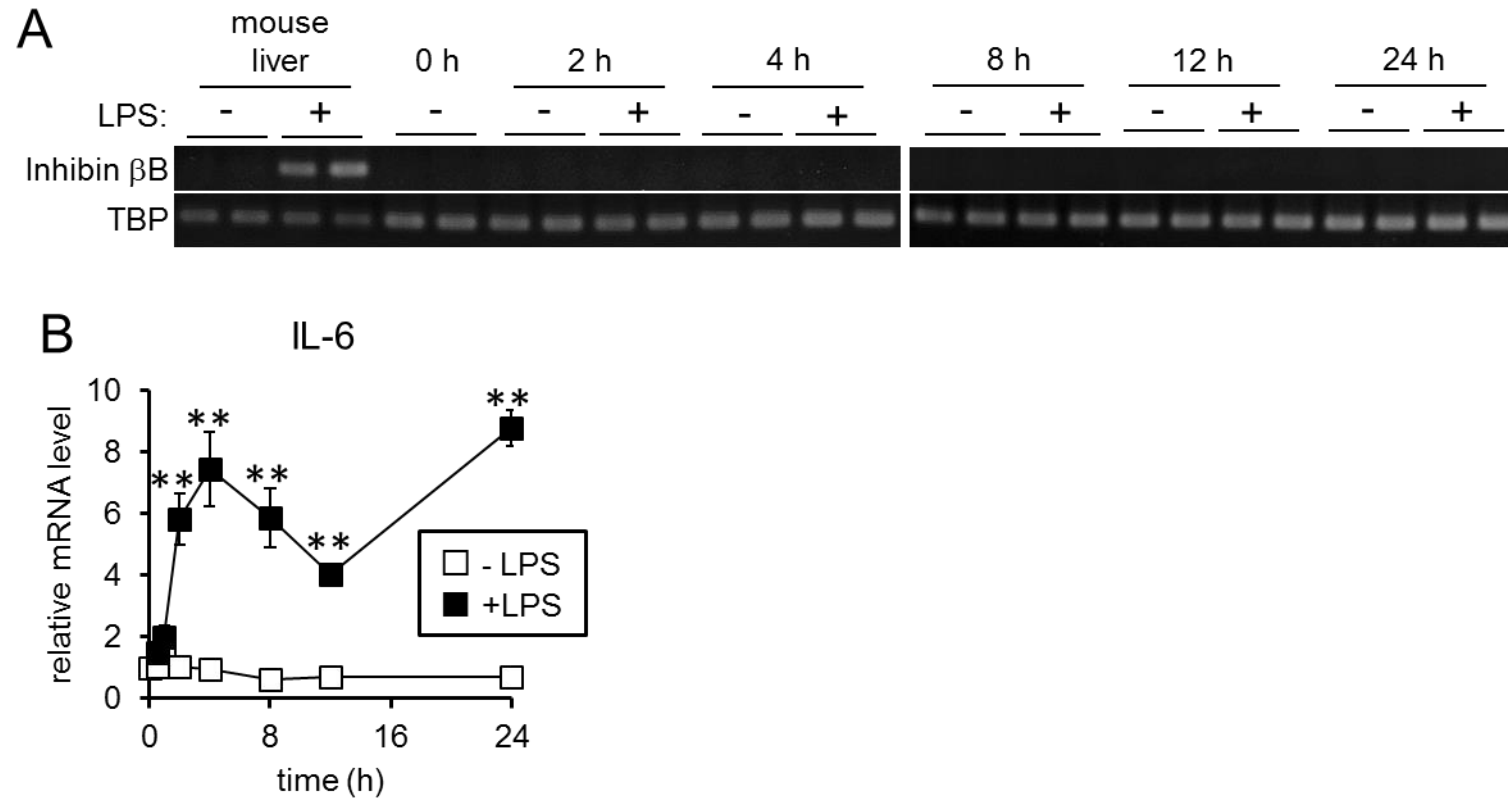

Figure S12. Expression of inhibin  $\beta$ B and IL-6 in RAW264.7 cells

RAW264.7 cells were treated with or without LPS (100 ng/mL) for the indicated time. The expression of inhibin  $\beta$ B (A) and IL-6 (B) were examined by RT-PCR and RT-qPCR analysis, respectively. cDNA from the livers of LPS-injected mice was used as a positive control. The levels in the control cells prior to IL-1 $\beta$  treatment were defined as 1. The data are presented as the mean  $\pm$  SE (n=3). \*\* $P$  < 0.05 vs. cells treated without LPS at the respective time points.

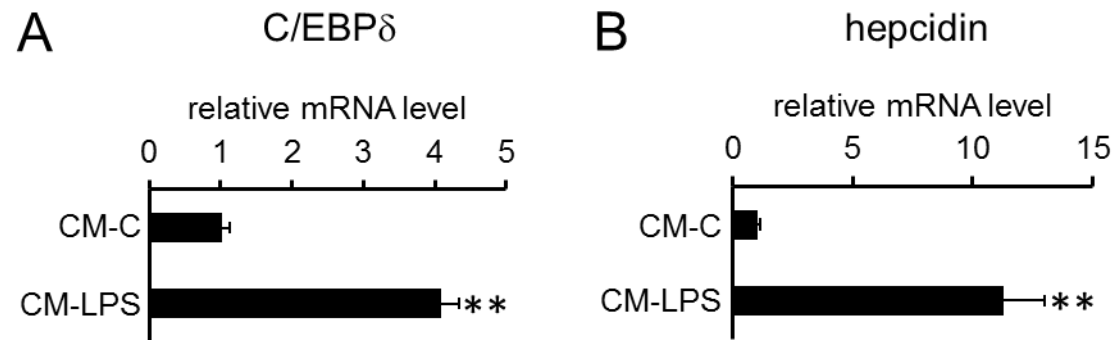

**Figure S13. C/EBP $\delta$  and hepcidin induction in primary mouse hepatocytes by molecules from activated macrophages**

Conditioned medium of RAW264.7 cells treated with (CM-LPS) or without (CM-C) LPS (100 ng/mL) for 30 h was prepared as described in EXPERIMENTAL PROCEDURES. Primary mouse hepatocytes were treated with either CM-C or CM-LPS for 24 h. Expression of C/EBP $\delta$  (A) and hepcidin (B) was examined by RT-qPCR analysis with the level in cells treated with control conditioned medium for 24 h defined as 1. The data are presented as the mean  $\pm$  SE (n=4). \*\* $P$  < 0.01 vs. cells treated with control supernatants.
